# Supplementary material
Source: MDPI journal article supplement (https://www.mdpi.com/2624-8549/5/2/77)

## Supporting Information

# Activated Carbon from Sugarcane Bagasse: A Low-Cost Approach towards Cr(VI) Removal from Wastewater

Rana Ahmed<sup>1</sup>, Inga Block<sup>1</sup>, Fabian Otte<sup>1</sup>, Christina Günter<sup>2</sup>, Alysson Duarte-Rodrigues<sup>3</sup>, Peter Hesemann<sup>3</sup>, Amitabh Banerji<sup>1</sup> and Andreas Taubert<sup>1,\*</sup>

<sup>1</sup> Institute of Chemistry, University of Potsdam, D-14476 Potsdam, Germany

<sup>2</sup> Institute of Geosciences, University of Potsdam, D-14476 Potsdam, Germany

<sup>3</sup> ICGM, Université de Montpellier-CNRS-ENSCM, 34095 Montpellier, France

\* Correspondence: ataubert@uni-potsdam.de; Tel.: +49-(0)331-977-5773.

### Contents:

#### IR-Spectra of SB1 to SB7

|    |                                  |
|----|----------------------------------|
| S2 | raw sugar cane bagasse (raw SCB) |
| S3 | SB1                              |
| S4 | SB2                              |
| S5 | SB3                              |
| S6 | SB4                              |
| S7 | SB5                              |
| S8 | SB6                              |
| S9 | SB7                              |

Raw sugar cane bagasse (raw SCB)

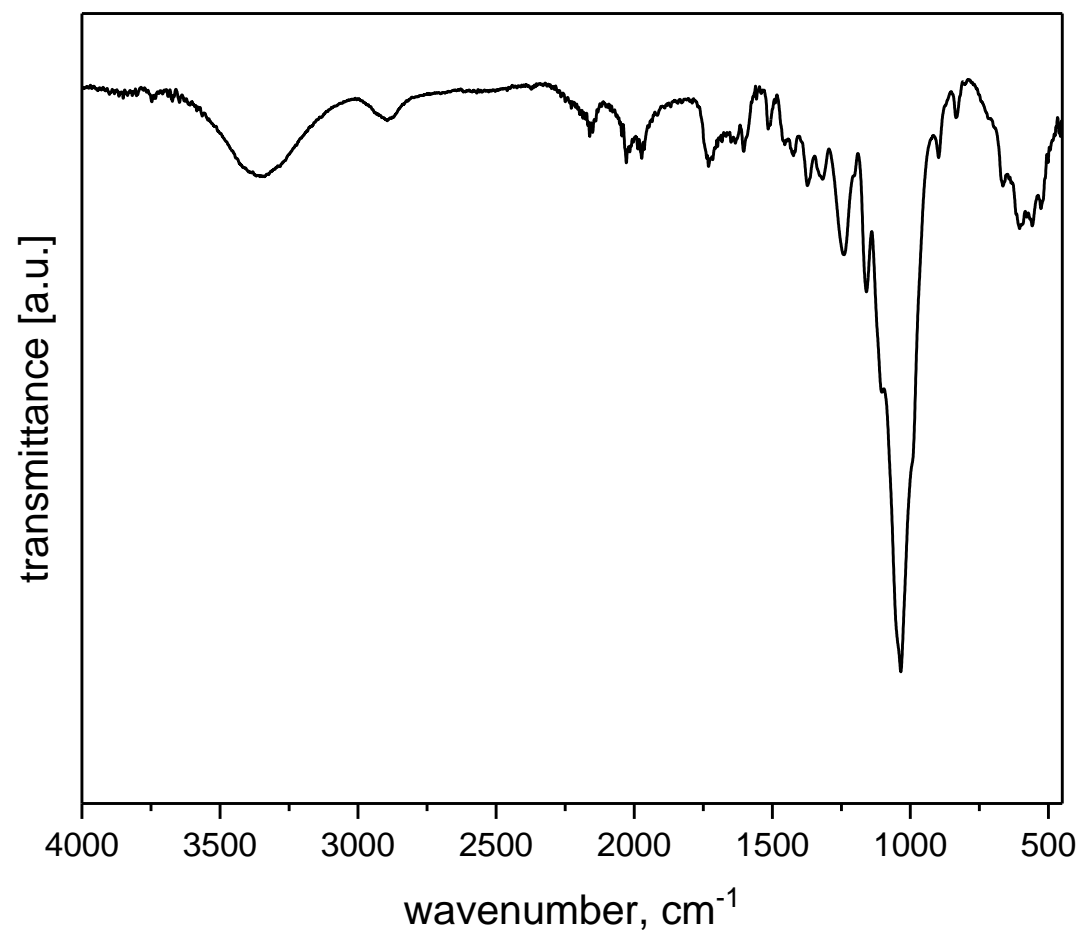

SB1

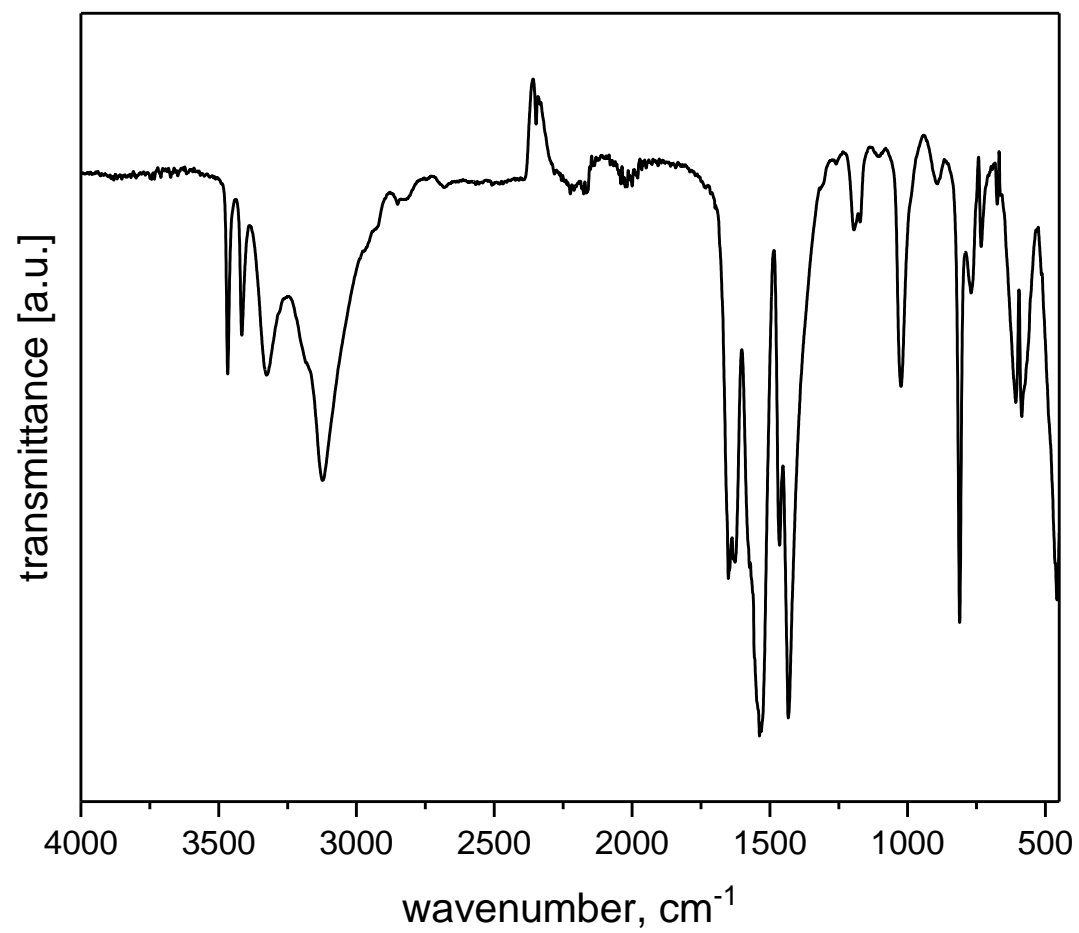

SB2

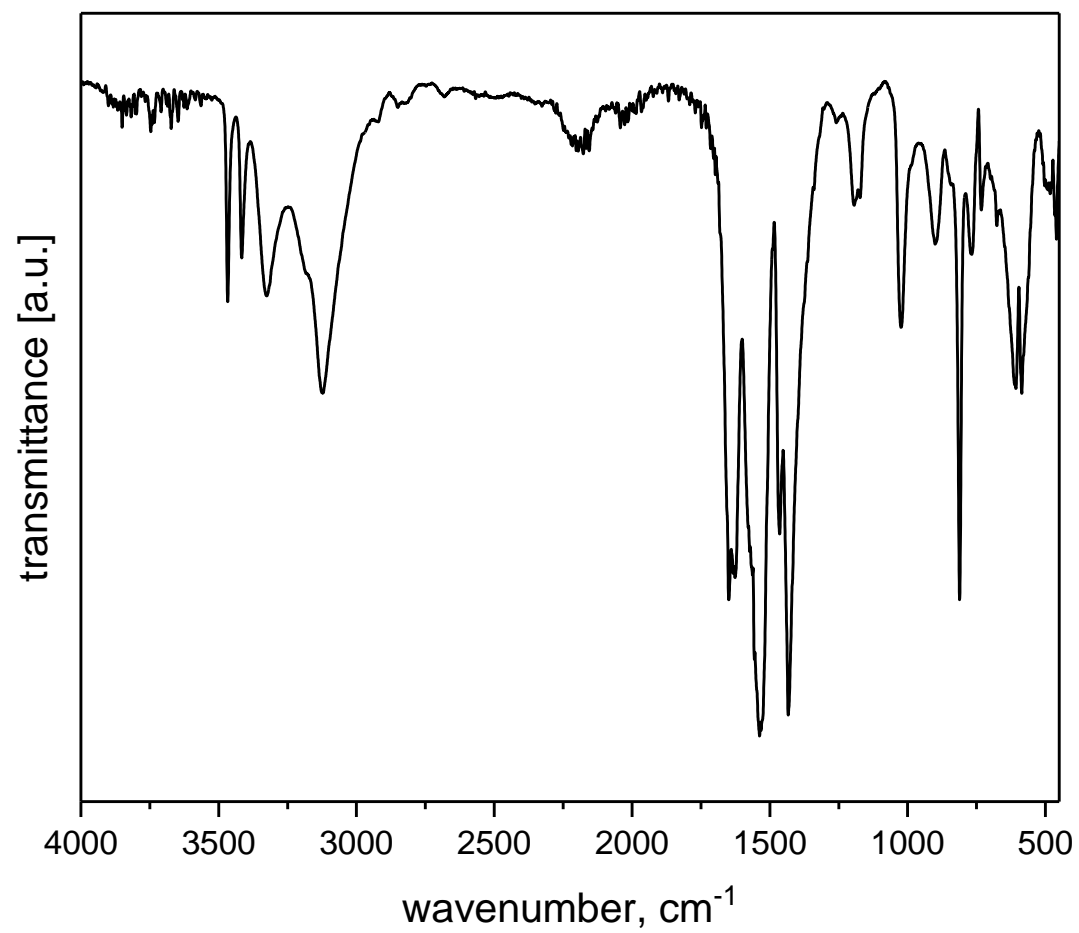

SB3

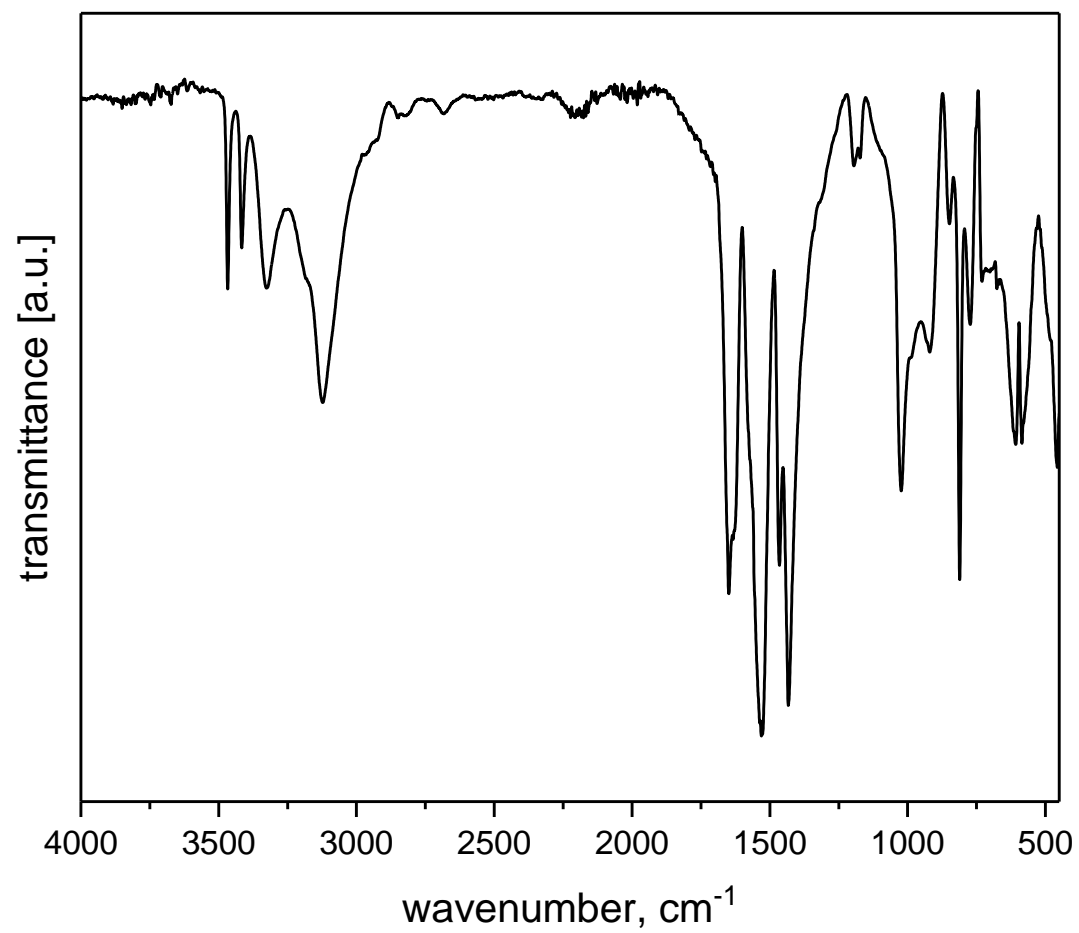

SB4

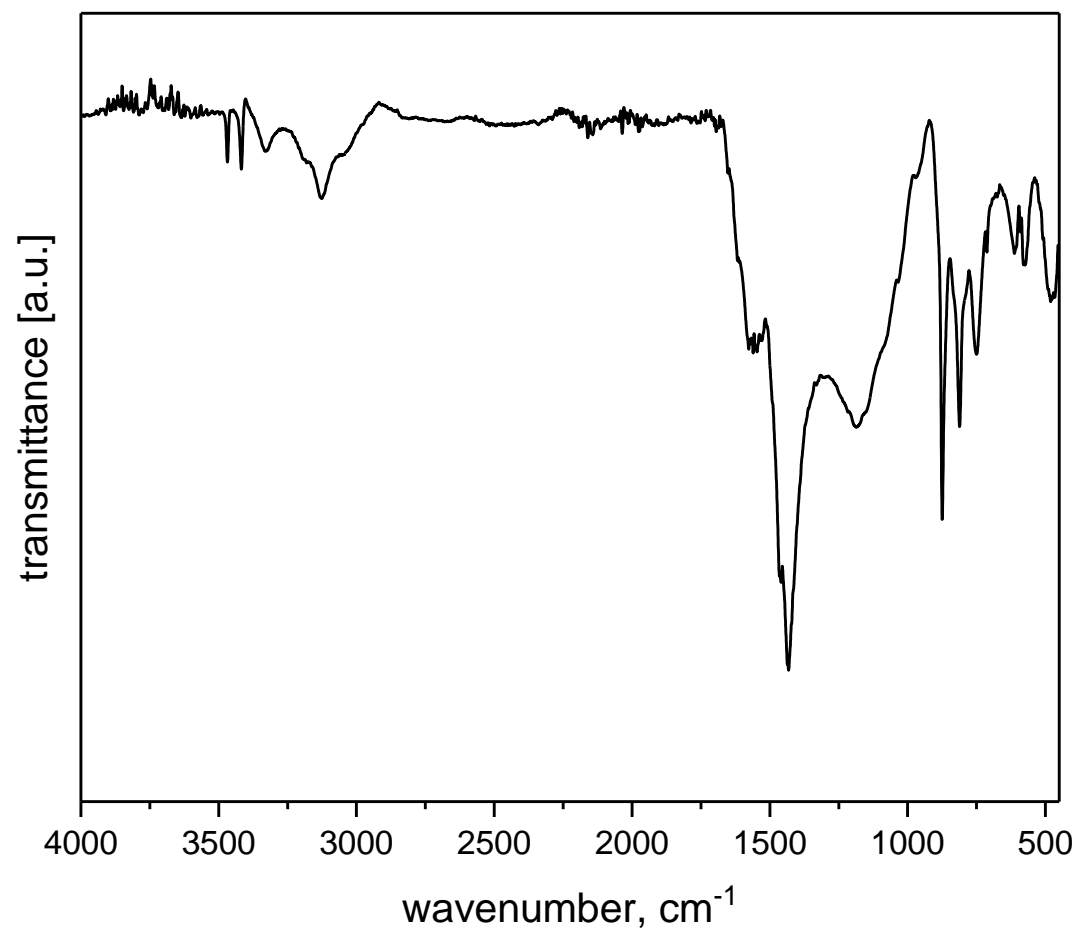

SB5

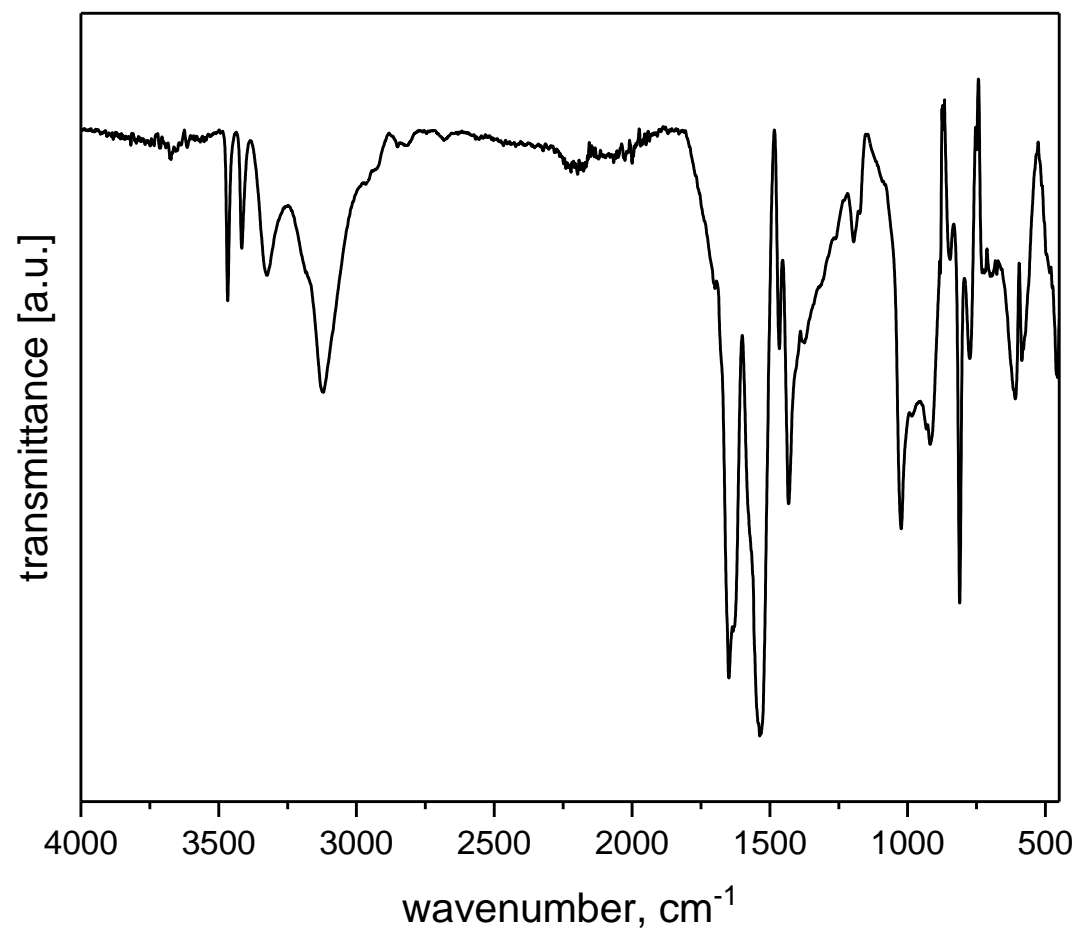

SB6

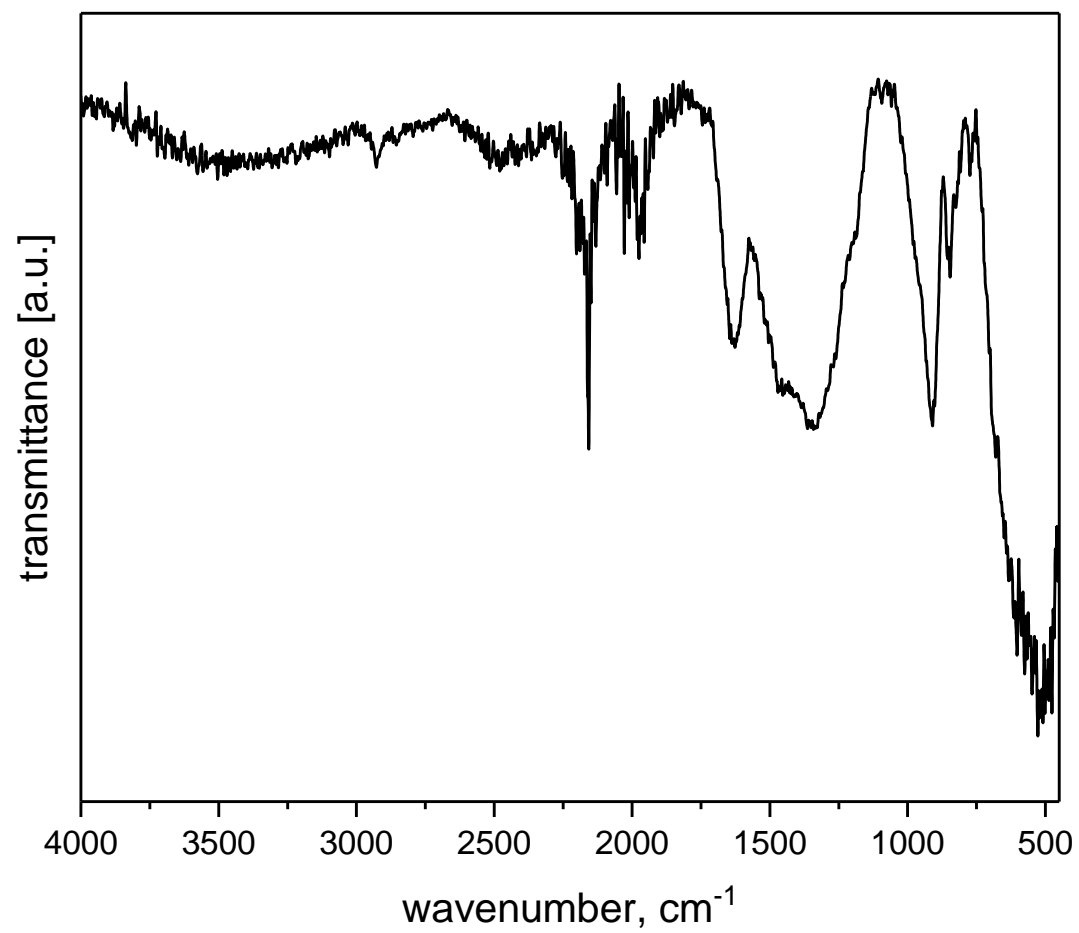



SB7

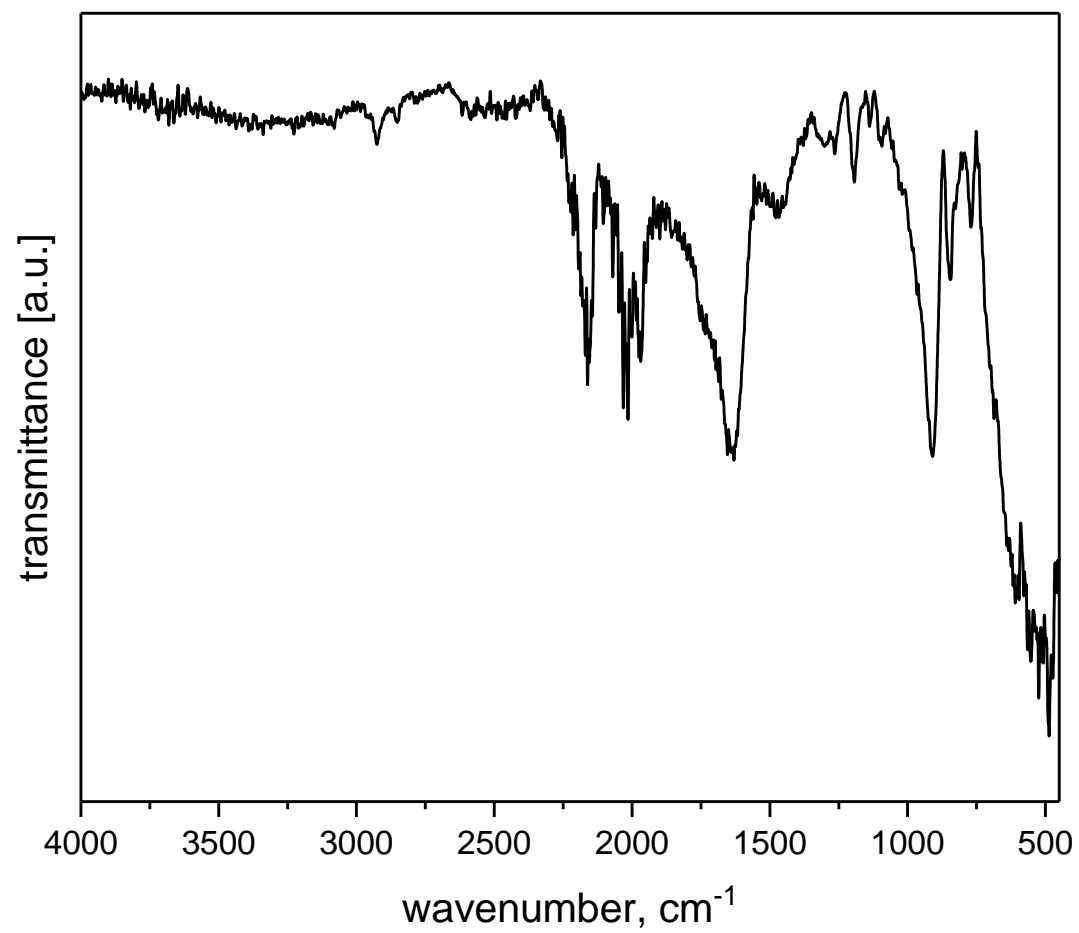

Supplement: s1 [file s1]
